# Supplementary material for: Nutrition-Oriented Reformulation of Extruded Cereals and Associated Environmental Footprint: A Case Study
Source: MDPI journal article supplement (doi:10.3390/foods9091260), 2020-09-08
Supplement: s1 [file s1]

(A)

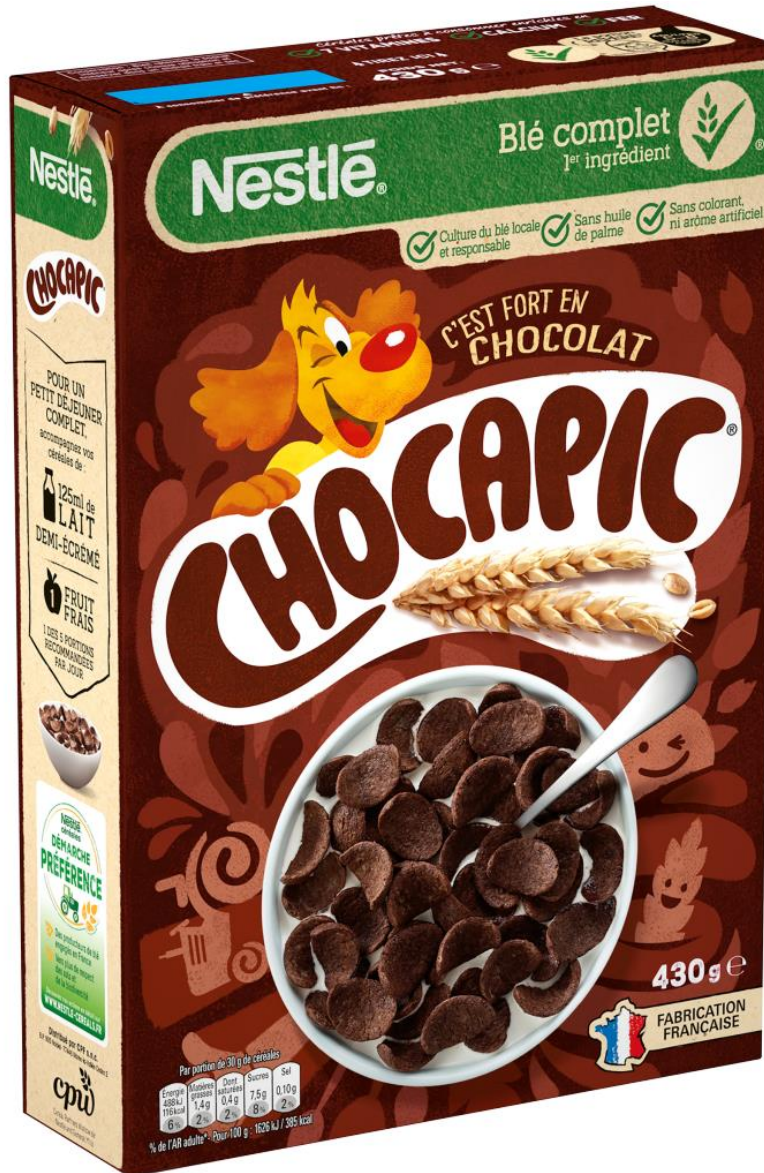

(B)

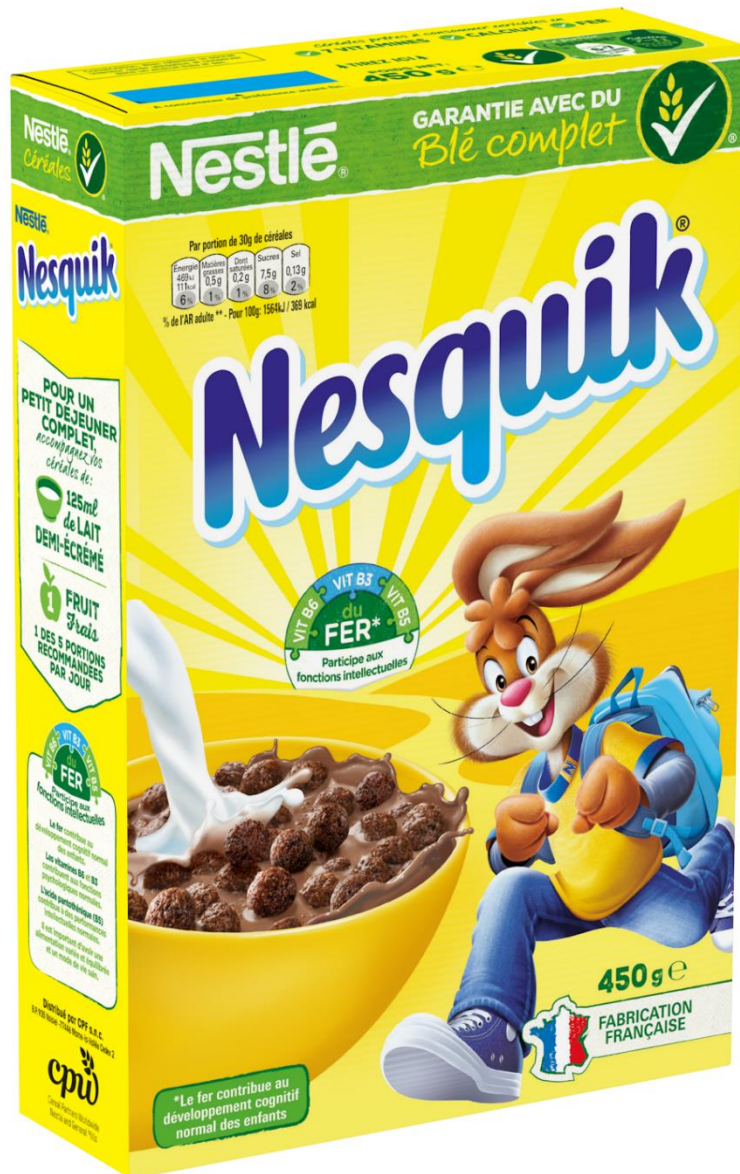

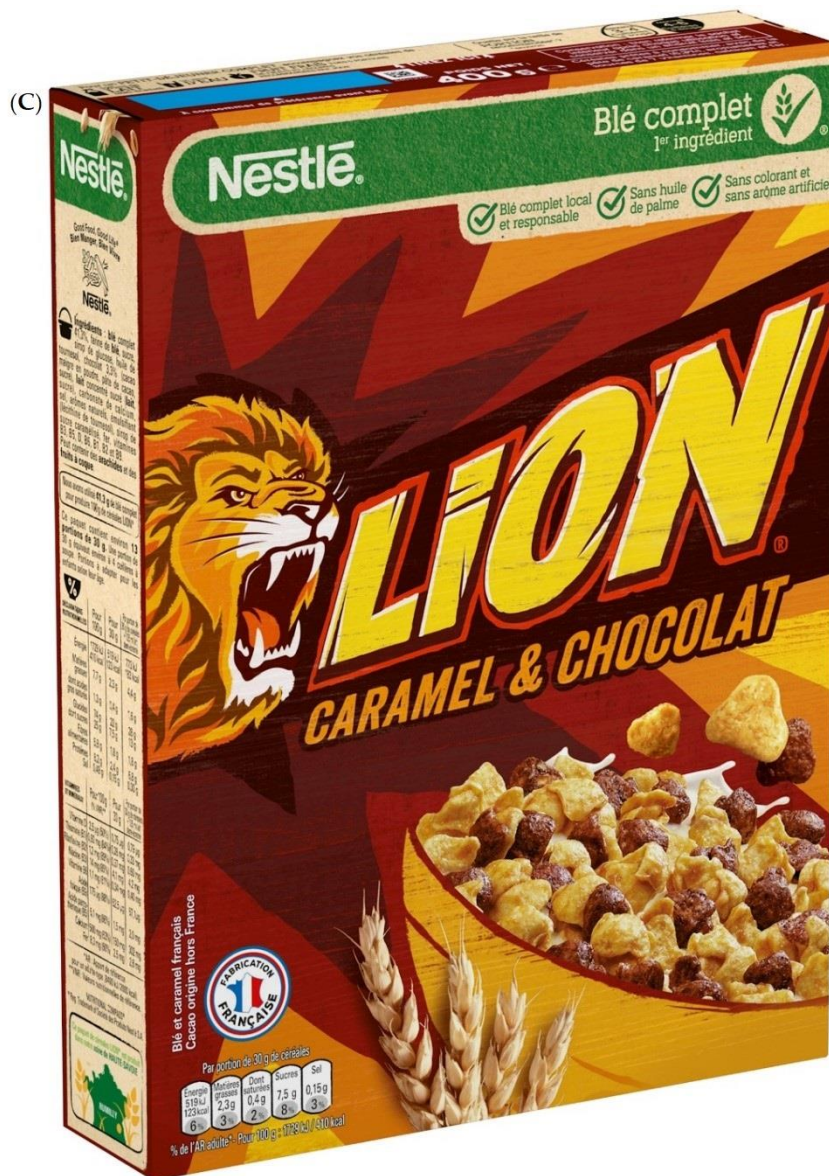

**Figure S1.** Detailed presentation of products used in the analysis as indicated in the packaging (2018 format). Cereal 1—Chocapic 430 g (A); Cereal 2—Nesquik 450 g (B); Cereal 3—Lion 480 g (C).



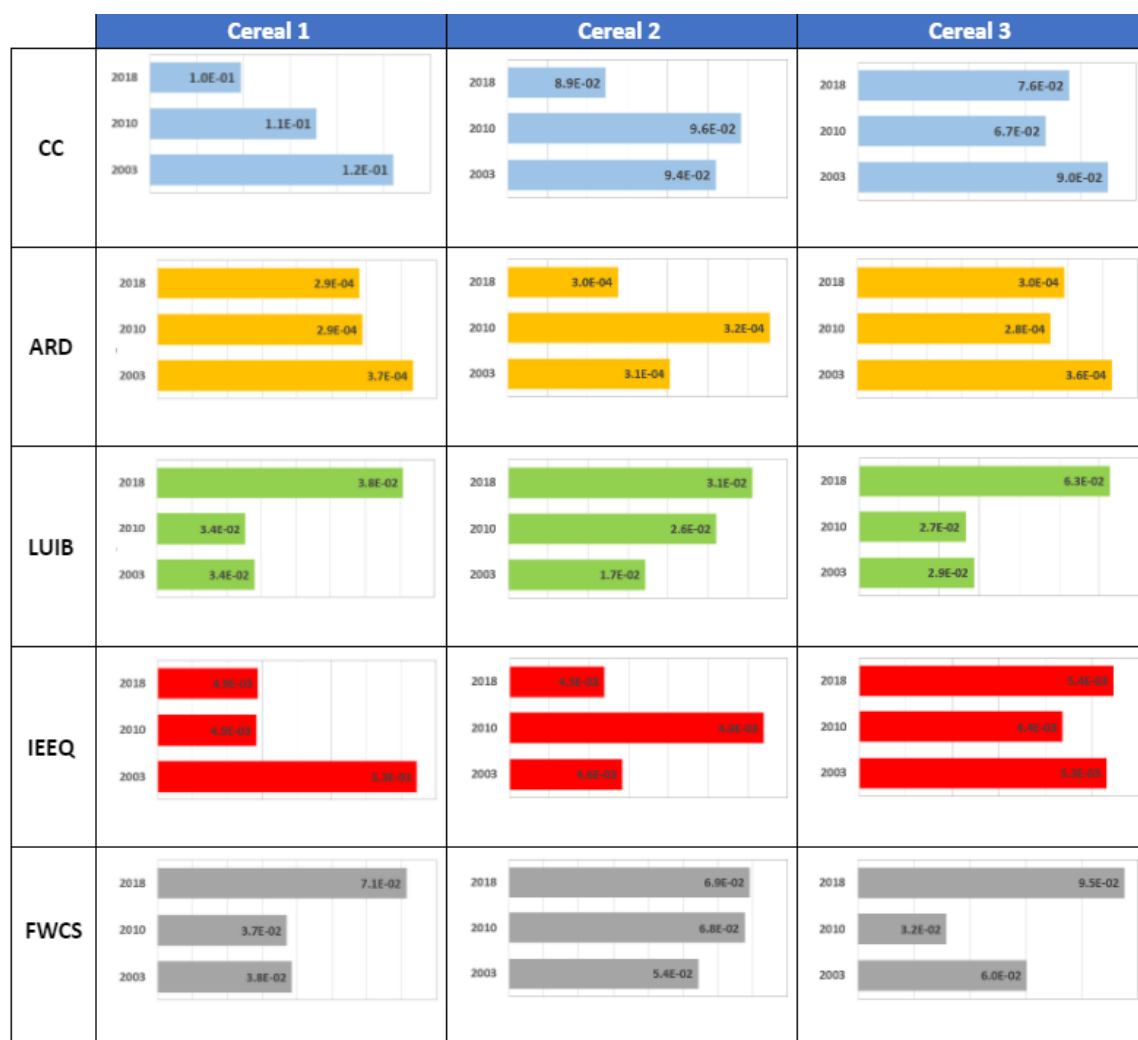

**Figure S2.** Environmental impacts of one serving size (30 g) of three breakfast cereal products manufactured in France over a 15 year period (2003–2018). CC: Climate change; ARD: Abiotic resource depletion; LUIB: Land use impact on biodiversity; IEEQ: Impact on ecosphere/ecosystems quality; FWCS: Freshwater consumption scarcity.

**Table S1.** Ingredients used in Chocapic (Cereal 1) breakfast cereal (period 2003–2018). (g ingredient needed / 100g finished product)—cut-off 0.15%.

| <b>Ingredients</b>  | <b>2003 Recipe</b> | <b>2010 Recipe</b> | <b>2018 Recipe</b> |
|---------------------|--------------------|--------------------|--------------------|
| Refined wheat flour | 52.0               | 24.9               | 16.8               |
| Whole wheat flour   |                    | 31.9               | 33.5               |
| Corn semolina       |                    |                    | 15.1               |
| Sugar               | 38.0               | 32.6               | 21.8               |
| Dextrose            | 4.01               | 3.62               |                    |
| Glucose syrup       |                    |                    | 7.38               |
| Cocoa powder        | 7.72               | 8.57               | 7.33               |
| Palm oil            | 2.0                | 1.64               |                    |
| Sunflower oil       |                    |                    | 1.65               |
| Calcium carbonate   | 0.66               | 0.70               | 1.15               |
| Salt                | 0.38               | 0.29               | 0.25               |
| Soya lecithin       | 0.40               | 0.44               |                    |
| Sunflower lecithin  |                    |                    | 0.43               |
| Malt extract        | 0.18               | 2.13               |                    |

**Table S2.** Ingredients used in Nesquik (Cereal 2) breakfast cereal (period 2003–2018). (g ingredient needed / 100g finished product)—cut-off 0.15%.

| <b>Ingredients</b> | <b>2003 Recipe</b> | <b>2010 Recipe</b> | <b>2018 Recipe</b> |
|--------------------|--------------------|--------------------|--------------------|
| Rice flour         | 34.3               | 6.17               |                    |
| Corn semolina      | 18.1               | 23.7               | 17.0               |
| Wheat starch       | 5.0                |                    |                    |
| Whole wheat flour  |                    | 31.8               | 51.4               |
| Sugar              | 35.3               | 32.8               | 23.1               |
| Dextrose           | 2.85               | 1.98               |                    |
| Glucose syrup      |                    |                    | 11.3               |
| Cocoa powder       | 5.63               | 6.02               | 5.68               |
| Palm oil           | 2.85               | 1.66               |                    |
| Calcium carbonate  | 0.67               | 0.70               | 1.12               |
| Salt               | 0.70               | 0.47               | 0.43               |

**Table S3.** Ingredients used in Lion (Cereal 3) breakfast cereal (period 2003–2018). (g ingredient needed / 100g finished product)—cut-off 0.15%.

| Ingredients              | 2003 Recipe | 2010 Recipe | 2018 Recipe |
|--------------------------|-------------|-------------|-------------|
| Refined wheat flour      | 35.6        | 17.7        | 23.0        |
| Whole wheat flour        |             | 34.6        | 41.3        |
| Corn semolina            | 13.5        |             |             |
| Rice flour               |             | 6.29        |             |
| Sugar                    | 28          | 26.1        | 21.3        |
| Glucose syrup            | 8.80        | 6.85        | 11.8        |
| Cocoa powder/mass        | 2.25        | 1.99        | 2.54        |
| Palm oil                 | 7.23        | 5.18        |             |
| Sunflower oil            |             |             | 5.58        |
| Caramel paste            | 7.97        | 8.52        |             |
| Skim milk powder         | 2.10        |             |             |
| Sweetened condensed milk |             |             | 3.23        |
| Dextrose                 | 1.18        | 1.02        |             |
| Calcium carbonate        | 1.38        | 0.68        | 1.18        |
| Salt                     | 0.59        | 0.51        | 0.49        |

**Table S4.** Sourcing of materials.

| Material                   | Source          | Mode of Transportation | Distance (km) |
|----------------------------|-----------------|------------------------|---------------|
| Refined wheat flour        | France          | Truck, >32 ton         | 250           |
| Whole wheat flour          | France          | Truck, >32 ton         | 250           |
| Rice flour                 | Europe          | Truck, >32 ton         | 1000          |
| Corn semolina              | Europe          | Truck, >32 ton         | 1000          |
| Wheat starch               | Europe          | Truck, >32 ton         | 1000          |
| Sugar                      | France          | Truck, >32 ton         | 250           |
| Dextrose                   | Europe          | Truck, >32 ton         | 1000          |
| Glucose syrup              | Europe          | Truck, >32 ton         | 1000          |
| Sweetened condensed milk   | Europe          | Truck, >32 ton         | 1000          |
| Caramel paste              | Europe          | Truck, >32 ton         | 1000          |
| Cocoa powder               | East Africa     | Truck, >32 ton         | 1000          |
|                            |                 | Transoceanic ship      | 10 000        |
| Palm oil & palm kernel oil | South East Asia | Truck, >32 ton         | 1000          |
|                            |                 | Transoceanic ship      | 10 000        |
| Sunflower oil              | France          | Truck, >32 ton         | 250           |
| Calcium carbonate          | Europe          | Truck, >32 ton         |               |
| Salt                       | France          | Truck, >32 ton         | 250           |
| Soya lecithin              | United States   | Truck, >32 ton         | 1000          |
|                            |                 | Transoceanic ship      | 6 000         |
| Sunflower lecithin         | France          | Truck, >32 ton         | 250           |
| Malt extract               | Europe          | Truck, >32 ton         | 1000          |
| Skimmed milk powder        | Europe          | Truck, >32 ton         | 1000          |
| HDPE bag                   | Europe          | Truck, >32 ton         | 1080          |
| Folding board box (FBB)    | Europe          | Truck, >32 ton         | 1080          |
|                            | France          | Truck, >32 ton         | 384           |
| Corrugated board case      | France          | Truck, > 32ton         | 250           |
| LLDPE Stretch film         | Europe          | Truck, > 32ton         | 1080          |

**Table S5.** Packaging system composition (g material/breakfast cereal box).

| Packaging Material      | Chocapic (430 g) |       |       | Lion (480 g) |       |       | Nesquik (450 g) |       |       |
|-------------------------|------------------|-------|-------|--------------|-------|-------|-----------------|-------|-------|
|                         | 2003             | 2010  | 2018  | 2003         | 2010  | 2018  | 2003            | 2010  | 2018  |
| HDPE bag                | 9.80             | 8.70  | 8.20  | 9.40         | 10.10 | 9.60  | 10.80           | 9.50  | 9.00  |
| Folding board box (FBB) | 52.40            | 45.60 | 44.70 | 55.40        | 48.20 | 47.40 | 59.60           | 54.20 | 53.30 |
| Corrugated board case   | 23.30            | 21.20 | 19.30 | 20.90        | 19.00 | 16.80 | 25.70           | 23.30 | 21.20 |
| LLDPE Stretch film      | 0.84             | 0.76  | 0.69  | 0.69         | 0.63  | 0.57  | 0.91            | 0.82  | 0.75  |
| Boxes per pallet        | 576              |       |       | 704          |       |       | 432             |       |       |

**Table S6.** Manufacturing processes data (per kg of product).

| Inputs                    | Consumption 2003 |           | Consumption 2010 |           | Consumption 2018 |           |
|---------------------------|------------------|-----------|------------------|-----------|------------------|-----------|
|                           | Factory 1        | Factory 2 | Factory 1        | Factory 2 | Factory 1        | Factory 2 |
| Electricity (France) (MJ) | 4.86             | 4.72      | 4.58             | 4.16      | 2.17             | 1.52      |
| Heat (natural gas) (MJ)   | 3.18             | 5.76      | 4.32             | 2.96      | 4.42             | 2.89      |
| Water (l)                 | 12.30            | 9.60      | 3.57             | 3.05      | 5.20             | 3.16      |

**Table S7.** End of life options for packaging materials in France.

| Material              | Year | SL    | I    | IER   | R     | C     |
|-----------------------|------|-------|------|-------|-------|-------|
| Municipal solid waste | 2003 | 38.0% | 2.2% | 31.8% | 15.0% | 13.0% |
|                       | 2010 | 29.1% | 1.2% | 33.6% | 20.0% | 16.0% |
|                       | 2018 | 20.9% | 0.3% | 34.8% | 25.1% | 18.9% |
| Plastic packaging     | 2003 | 43.9% | 2.5% | 36.7% | 17.0% | -     |
|                       | 2010 | 36.0% | 1.5% | 41.5% | 21.0% | -     |
|                       | 2018 | 27.5% | 0.3% | 45.7% | 26.5% | -     |
| Cardboard             | 2003 | 30.6% | 1.7% | 25.6% | 42.0% | -     |
|                       | 2010 | 20.0% | 0.8% | 23.1% | 56.0% | -     |
|                       | 2018 | 12.0% | 0.1% | 19.9% | 68.0% | -     |

CC: Composting; I: Incineration without energy recovery; IER: Incineration with energy recovery; R: Recycling; SL: Sanitary landfill.

**Table S8.** Nutritional content of all breakfast cereal recipes.

| Product                    | Cereal 1 |      |      | Cereal 2 |      |      | Cereal 3 |      |      |
|----------------------------|----------|------|------|----------|------|------|----------|------|------|
| Year                       | 2003     | 2010 | 2018 | 2003     | 2010 | 2018 | 2003     | 2010 | 2018 |
| Nutritional Labels / 100 g |          |      |      |          |      |      |          |      |      |
| Energy (kcal)              | 392      | 393  | 385  | 394      | 379  | 369  | 422      | 407  | 408  |
| Protein (g)                | 7.7      | 8.4  | 8.5  | 5        | 7.3  | 8.4  | 6.4      | 7.4  | 8.1  |
| Carbohydrate (g)           | 79.9     | 76   | 73.4 | 83.6     | 79.1 | 75.8 | 77.5     | 76.7 | 72.8 |
| Sugars (g)                 | 42       | 37   | 24.9 | 38       | 35   | 24.9 | 39.1     | 35   | 25   |
| Fat (g)                    | 4.6      | 4.8  | 4.6  | 4.4      | 3.8  | 1.7  | 9.6      | 7.8  | 7.9  |
| Saturated fat (g)          | 2.8      | 2    | 1.3  | 3        | 1.6  | 0.6  | 4.8      | 3.2  | 1.4  |
| Fibre (g)                  | 3.5      | 5.9  | 8    | 2.4      | 5.1  | 8.7  | 1.7      | 4.3  | 6.7  |
| Sodium (g)                 | 0.2      | 0.1  |      | 0.3      | 0.2  |      | 0.3      | 0.2  |      |
| Salt (g)                   |          |      | 0.33 |          |      | 0.44 |          |      | 0.49 |
| Nutri-Score (Letter/Score) | D/14     | C/9  | C/6  | D/15     | C/9  | B/0  | E/19     | D/13 | C/8  |

**Table S9.** Relative contribution of life cycle stages to overall impacts for Cereal 1.

| Year | Indicator | Ingredients | Ingredients Sourcing | Packaging | Manufacture | Distribution | Storage and Retail | Packaging End of Life |
|------|-----------|-------------|----------------------|-----------|-------------|--------------|--------------------|-----------------------|
| 2003 | ARD       | 29%         | 3%                   | 22%       | 38%         | 4%           | 5%                 | -1%                   |
| 2010 |           | 34%         | 3%                   | 24%       | 28%         | 5%           | 7%                 | -2%                   |
| 2018 |           | 40%         | 4%                   | 24%       | 22%         | 5%           | 7%                 | -2%                   |
| 2003 | CC        | 68%         | 1%                   | 8%        | 16%         | 2%           | 2%                 | 2%                    |
| 2010 |           | 74%         | 1%                   | 8%        | 10%         | 2%           | 3%                 | 1%                    |
| 2018 |           | 75%         | 1%                   | 8%        | 9%          | 2%           | 3%                 | 1%                    |
| 2003 | FWCS      | 93%         | 0%                   | 5%        | 3%          | 0%           | 1%                 | -2%                   |
| 2010 |           | 95%         | 0%                   | 4%        | 2%          | 0%           | 1%                 | -2%                   |
| 2018 |           | 98%         | 0%                   | 2%        | 1%          | 0%           | 0%                 | -1%                   |
| 2003 | IEEQ      | 85%         | 1%                   | 7%        | 4%          | 1%           | 2%                 | 0%                    |
| 2010 |           | 87%         | 1%                   | 6%        | 3%          | 1%           | 2%                 | 0%                    |
| 2018 |           | 88%         | 1%                   | 6%        | 2%          | 1%           | 2%                 | 0%                    |
| 2003 | LUIB      | 93%         | 0%                   | 9%        | 0%          | 0%           | 0%                 | -3%                   |
| 2010 |           | 95%         | 0%                   | 8%        | 0%          | 0%           | 0%                 | -3%                   |
| 2018 |           | 96%         | 0%                   | 7%        | 0%          | 0%           | 0%                 | -3%                   |

ARD: Abiotic resource depletion; CC: Climate change; FWCS: Freshwater consumption scarcity; IEEQ: Impact on ecosphere/ecosystems quality; LUIB: Land use impact on biodiversity.

**Table S10.** Relative contribution of life cycle stages to overall impacts for Cereal 2.

| Year | Indicator | Ingredients | Ingredients Sourcing | Packaging | Manufacture | Distribution | Storage and Retail | Packaging End of Life |
|------|-----------|-------------|----------------------|-----------|-------------|--------------|--------------------|-----------------------|
| 2003 | ARD       | 30%         | 5%                   | 25%       | 31%         | 5%           | 6%                 | -1%                   |
| 2010 |           | 31%         | 4%                   | 22%       | 34%         | 5%           | 6%                 | -1%                   |
| 2018 |           | 34%         | 3%                   | 22%       | 32%         | 5%           | 6%                 | -2%                   |
| 2003 | CC        | 66%         | 2%                   | 10%       | 14%         | 2%           | 3%                 | 2%                    |
| 2010 |           | 67%         | 2%                   | 9%        | 16%         | 2%           | 3%                 | 2%                    |
| 2018 |           | 68%         | 1%                   | 9%        | 15%         | 2%           | 3%                 | 1%                    |
| 2003 | FWCS      | 95%         | 0%                   | 3%        | 3%          | 0%           | 0%                 | -1%                   |
| 2010 |           | 97%         | 0%                   | 2%        | 1%          | 0%           | 0%                 | -1%                   |
| 2018 |           | 98%         | 0%                   | 2%        | 1%          | 0%           | 0%                 | -2%                   |
| 2003 | IEEQ      | 84%         | 1%                   | 7%        | 4%          | 1%           | 2%                 | 0%                    |
| 2010 |           | 86%         | 1%                   | 6%        | 4%          | 1%           | 2%                 | 0%                    |
| 2018 |           | 87%         | 1%                   | 7%        | 3%          | 1%           | 2%                 | 0%                    |
| 2003 | LUIB      | 87%         | 0%                   | 18%       | 1%          | 0%           | 0%                 | -6%                   |
| 2010 |           | 93%         | 0%                   | 11%       | 0%          | 0%           | 0%                 | -5%                   |
| 2018 |           | 95%         | 0%                   | 9%        | 0%          | 0%           | 0%                 | -4%                   |

ARD: Abiotic resource depletion; CC: Climate change; FWCS: Freshwater consumption scarcity; IEEQ: Impact on ecosphere/ecosystems quality; LUIB: Land use impact on biodiversity.



**Table S11.** Relative contribution of life cycle stages to overall impacts for Cereal 3.

| Year | Indicator | Ingredients | Ingredients Sourcing | Packaging | Manufacture | Distribution | Storage and Retail | Packaging End of Life |
|------|-----------|-------------|----------------------|-----------|-------------|--------------|--------------------|-----------------------|
| 2003 | ARD       | 31%         | 4%                   | 19%       | 38%         | 4%           | 5%                 | -1%                   |
| 2010 |           | 32%         | 4%                   | 24%       | 30%         | 6%           | 6%                 | -2%                   |
| 2018 |           | 45%         | 3%                   | 21%       | 22%         | 5%           | 6%                 | -2%                   |
| 2003 | CC        | 60%         | 2%                   | 9%        | 21%         | 2%           | 3%                 | 2%                    |
| 2010 |           | 60%         | 2%                   | 11%       | 17%         | 3%           | 4%                 | 2%                    |
| 2018 |           | 70%         | 2%                   | 10%       | 11%         | 3%           | 3%                 | 1%                    |
| 2003 | FWCS      | 96%         | 0%                   | 3%        | 2%          | 0%           | 0%                 | -1%                   |
| 2010 |           | 95%         | 0%                   | 4%        | 2%          | 0%           | 1%                 | -3%                   |
| 2018 |           | 99%         | 0%                   | 1%        | 0%          | 0%           | 0%                 | -1%                   |
| 2003 | IEEQ      | 86%         | 1%                   | 6%        | 4%          | 1%           | 2%                 | 0%                    |
| 2010 |           | 86%         | 1%                   | 6%        | 3%          | 1%           | 2%                 | 0%                    |
| 2018 |           | 91%         | 1%                   | 5%        | 2%          | 1%           | 1%                 | 0%                    |
| 2003 | LUIB      | 93%         | 0%                   | 10%       | 0%          | 0%           | 0%                 | -3%                   |
| 2010 |           | 94%         | 0%                   | 9%        | 0%          | 0%           | 0%                 | -4%                   |
| 2018 |           | 98%         | 0%                   | 4%        | 0%          | 0%           | 0%                 | -2%                   |

ARD: Abiotic resource depletion; CC: Climate change; FWCS: Freshwater consumption scarcity;  
 IEEQ: Impact on ecosphere/ecosystems quality; LUIB: Land use impact on biodiversity.
